# Supplementary material for: Dynamic Evolution of NLR Genes in Dalbergioids
Source: MDPI journal article supplement (doi:10.3390/genes14020377), 2023-01-31
Supplement: s1 [file s1]

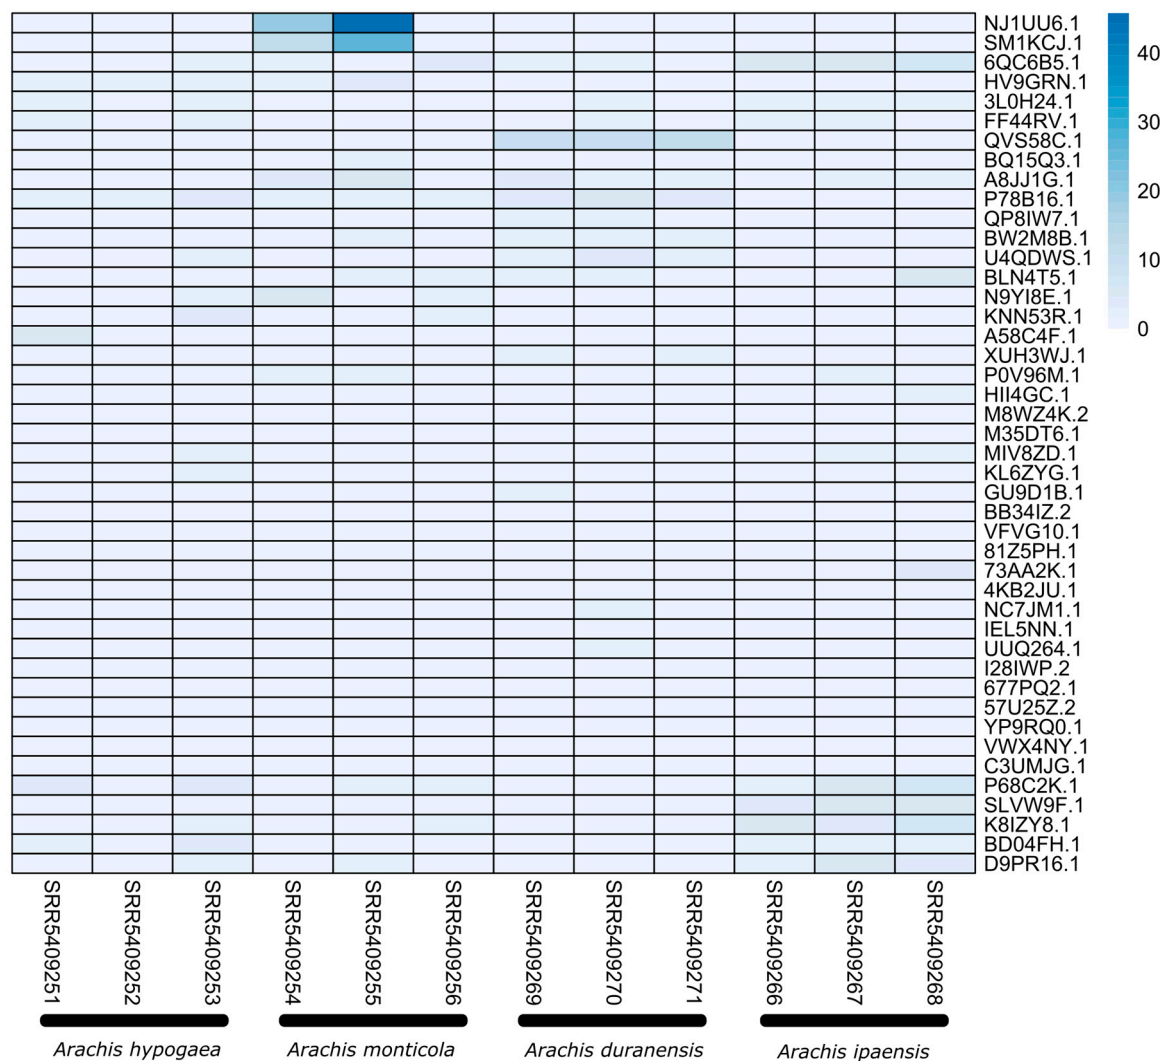

**Figure S3.** Expression of NLR genes in progenitor and tetraploid species. Table S1: The assembled transcriptomes of six *Dalbergioids* species.
