# Supplementary material for: Dynamic Evolution of NLR Genes in Dalbergioids
Source: MDPI journal article supplement (doi:10.3390/genes14020377), 2023-01-31
Supplement: s1 [file s1]

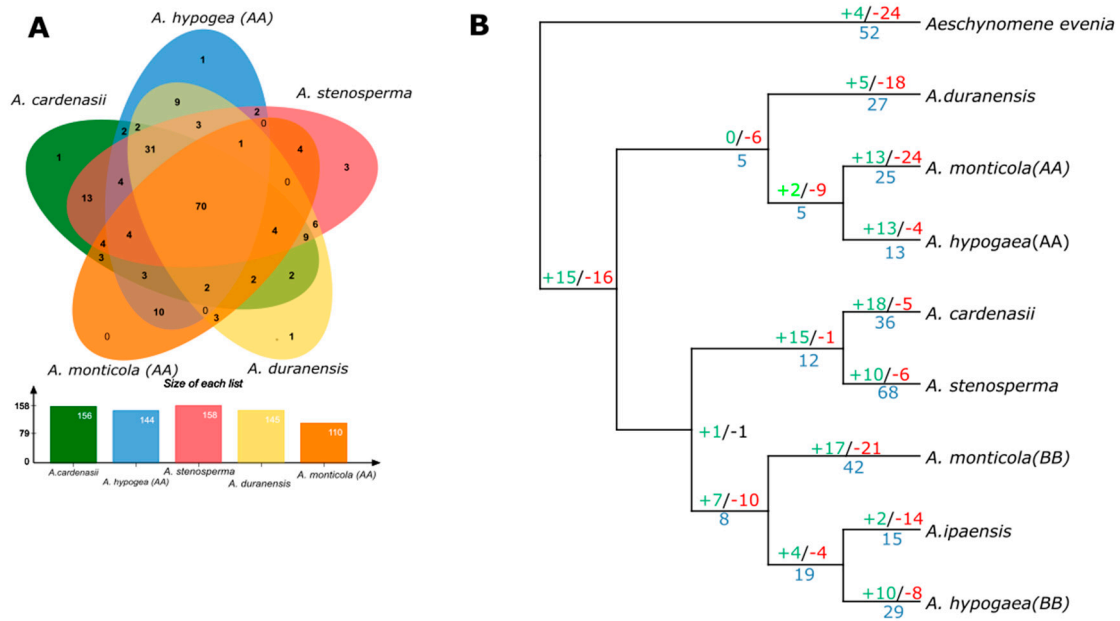

**Figure S1.** ortholog with gene gain and loss analysis. (A) Represents Venn diagram for five species of *Arachis*, suggesting 70 core components of *Arachis* NLRome. (B) Gene gain and loss tree for *Ae. evenia*, *A. duranensis*, *A. monticola*, *A. hypogaea*, *A. cardenasii*, *A. stenosperma*, and *A. ipaensis*. Green and red color above the node represent gene gain and loss, respectively, with gene duplication numbers shown in blue.
