# Supplementary material for: Dynamic Evolution of NLR Genes in Dalbergioids
Source: MDPI journal article supplement (doi:10.3390/genes14020377), 2023-01-31
Supplement: s1 [file s1]

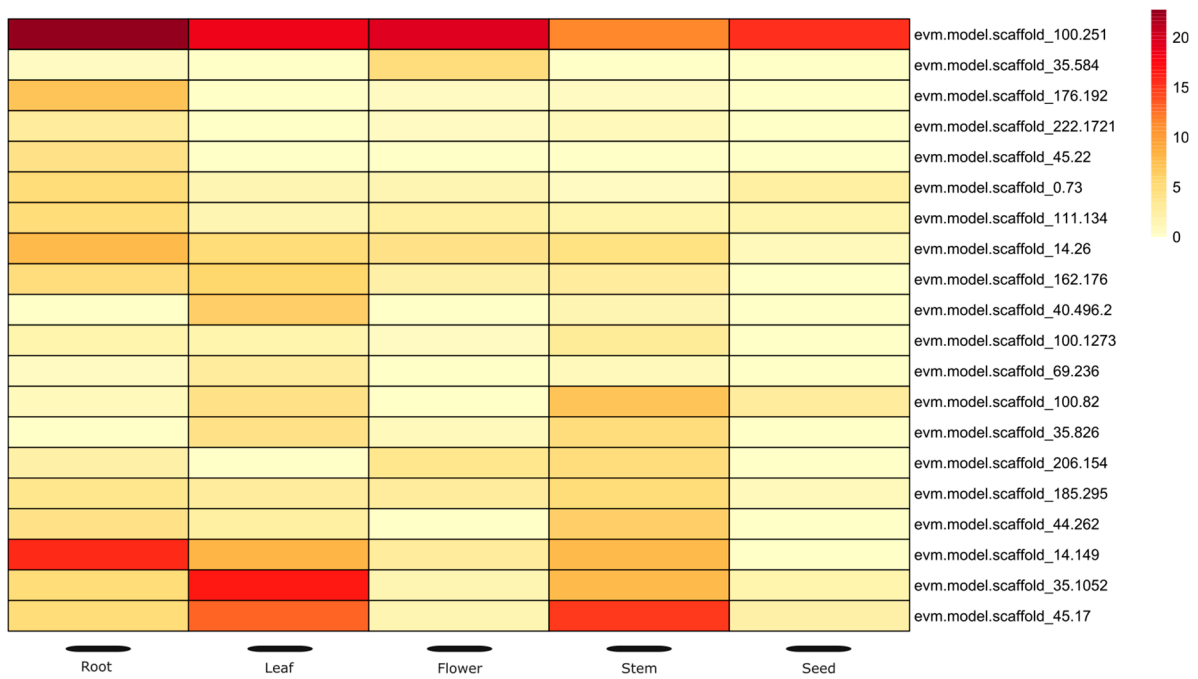

**Figure S2.** Expression of *NLR* genes in *D. odorifera*. Comparison of *NLR* gene expression in the root, leaf, flower, stem, and seed tissue.
